# Supplementary material for: Development and Validation of a Model Including Distinct Vascular Patterns to Estimate Survival in Hepatocellular Carcinoma
Source: PubMed Central journal article supplement (PMC8438596; doi:10.1001/jamanetworkopen.2021.25055), 2021-09-13

## Supplementary Online Content

Lin WP, Xing KL, Fu JC, et al. Development and validation of a model including distinct vascular patterns to estimate survival in hepatocellular carcinoma. *JAMA Netw Open*. 2021;4(9):e2125055. doi:10.1001/jamanetworkopen.2021.25055

**eTable 1.** Baseline Characteristics of the Patients in the Training and Validation Cohorts

**eTable 2.** Contributions of Different Variables to the Prediction of HCC Recurrence

**eTable 3.** 2-Year AUROC of Different Models of Recurrence-Free Survival in the Training and Validation Cohorts

**eTable 4.** Hazard Ratio and 2- and 5-Year Recurrence-Free Survival According to Each Risk Group Defined by the VMNS Score

**eFigure 1.** Representative Morphological Features of VETC in HCC Tissues by Immunohistochemical Staining of Human CD34

**eFigure 2.** Variable Selection Using LASSO Cox Proportional Hazards Regression Model

**eFigure 3.** Calibration Curves of the VMNS Nomogram at 2 Years in Each Cohort

This supplementary material has been provided by the authors to give readers additional information about their work.

**eTable 1. Baseline Characteristics of the Patients in the Training and Validation Cohorts**

| Variable                | Training cohort<br>(n = 243) | Internal validation cohort<br>(n = 122) | External validation cohort<br>(n = 133) |
|-------------------------|------------------------------|-----------------------------------------|-----------------------------------------|
| Age, years              | 50.8 ± 11.5                  | 50.2 ± 10.6                             | 53.7 ± 11.4                             |
| Sex                     |                              |                                         |                                         |
| female                  | 35 (14.4)                    | 11 (9.0)                                | 20 (15.0)                               |
| male                    | 208 (85.6)                   | 111 (91.0)                              | 113 (85.0)                              |
| HBV infection           |                              |                                         |                                         |
| absent                  | 29 (11.9)                    | 14 (11.5)                               | 20 (15.0)                               |
| present                 | 214 (88.1)                   | 108 (88.5)                              | 113 (85.0)                              |
| HCV infection           |                              |                                         |                                         |
| absent                  | 242 (99.6)                   | 119 (97.5)                              | 128 (96.2)                              |
| present                 | 1 (0.4)                      | 3 (2.5)                                 | 5 (3.8)                                 |
| PLT, 10 <sup>9</sup> /L | 173.0 (136.5, 214.2)         | 169.9 (131.8, 200.8)                    | 168.0 (115.0, 229.0)                    |
| ALB, g/L                | 43.0 (40.7, 44.8)            | 42.6 (40.5, 45.3)                       | 42.1 (38.0, 45.0)                       |
| Total bilirubin, μmol/L | 12.7 (10.2, 16.4)            | 13.1 (10.2, 16.2)                       | 14.4 (11.1, 21.8)                       |
| AFP, ng/ml              | 50.3 (5.7, 873.8)            | 128.7 (6.4, 1574.8)                     | 41.8 (6.7, 422.1)                       |
| PT, sec                 | 11.7 (11.1, 12.3)            | 11.7 (11.1, 12.4)                       | 12.6 (11.4, 13.5)                       |
| NE, 10 <sup>9</sup> /L  | 3.6 (2.8, 4.8)               | 3.7 (3.0, 4.6)                          | 3.5 (2.6, 4.8)                          |
| WBC, 10 <sup>9</sup> /L | 6.0 (5.0, 7.6)               | 6.3 (5.2, 7.4)                          | 6.3 (4.5, 7.9)                          |
| CRP, mg/L               | 2.1 (1.0, 5.5)               | 2.1 (1.1, 6.2)                          | 2.6 (0.8, 13.1)                         |
| ALT, U/L                | 38.7 (26.2, 54.2)            | 40.6 (27.0, 56.2)                       | 35.0 (25.0, 55.0)                       |
| AST, U/L                | 35.1 (26.9, 50.2)            | 34.6 (27.1, 48.9)                       | 39.0 (30.7, 56.0)                       |
| Liver cirrhosis         |                              |                                         |                                         |
| absent                  | 100 (41.2)                   | 44 (36.1)                               | 85 (63.9)                               |
| present                 | 143 (58.8)                   | 78 (63.9)                               | 48 (36.1)                               |
| Child-Pugh              |                              |                                         |                                         |
| A                       | 231 (95.1)                   | 115 (94.3)                              | 132 (99.2)                              |
| B                       | 12 (4.9)                     | 7 (5.7)                                 | 1 (0.8)                                 |
| Maximum tumor size, cm  | 4.8 (3.1, 7.0)               | 4.5 (3.2, 6.4)                          | 5.0 (3.5, 7.0)                          |
| Tumor number            |                              |                                         |                                         |
| single                  | 211 (86.8)                   | 106 (86.9)                              | 105 (78.9)                              |
| multiple                | 32 (13.2)                    | 16 (13.1)                               | 28 (21.1)                               |
| Tumor differentiation   |                              |                                         |                                         |
| well                    | 26 (10.7)                    | 7 (5.7)                                 | 24 (18.0)                               |
| moderate/poor           | 217 (89.3)                   | 115 (94.3)                              | 109 (82.0)                              |
| VETC                    |                              |                                         |                                         |
| negative                | 179 (73.7)                   | 99 (81.1)                               | 109 (82.0)                              |
| positive                | 64 (26.3)                    | 23 (18.9)                               | 24 (18.0)                               |
| MVI                     |                              |                                         |                                         |
| negative                | 152 (62.6)                   | 80 (65.6)                               | 98 (73.7)                               |
| positive                | 91 (37.4)                    | 42 (34.4)                               | 35 (26.3)                               |
| Anatomic resection      |                              |                                         |                                         |
| no                      | 178 (73.3)                   | 84 (68.9)                               | 101 (75.9)                              |
| yes                     | 65 (26.7)                    | 38 (31.1)                               | 32 (24.1)                               |
| Surgical margin, cm     |                              |                                         |                                         |
| ≤1                      | 155 (63.8)                   | 78 (63.9)                               | 78 (58.6)                               |
| >1                      | 88 (36.2)                    | 44 (36.1)                               | 55 (41.4)                               |
| JIS score               |                              |                                         |                                         |
| 0                       | 14 (5.8)                     | 5 (4.1)                                 | 3 (2.3)                                 |
| 1                       | 124 (51.0)                   | 66 (54.1)                               | 76 (57.1)                               |

|             |            |            |            |
|-------------|------------|------------|------------|
| 2           | 87 (35.8)  | 40 (32.8)  | 41 (30.8)  |
| 3           | 18 (7.4)   | 11 (9.0)   | 13 (9.8)   |
| TNM stage   |            |            |            |
| I           | 139 (57.2) | 72 (59.0)  | 82 (61.7)  |
| II          | 86 (35.4)  | 40 (32.8)  | 38 (28.6)  |
| IIIa        | 18 (7.4)   | 10 (8.2)   | 13 (9.8)   |
| BCLC stage  |            |            |            |
| 0           | 16 (6.6)   | 7 (5.7)    | 6 (4.5)    |
| A           | 202 (83.1) | 102 (83.6) | 101 (75.9) |
| B           | 25 (10.3)  | 13 (10.7)  | 26 (19.5)  |
| Tokyo score |            |            |            |
| 0           | 14 (5.8)   | 4 (3.3)    | 1 (0.8)    |
| 1           | 87 (35.8)  | 46 (37.7)  | 44 (33.1)  |
| 2           | 100 (41.2) | 49 (40.2)  | 42 (31.6)  |
| 3           | 28 (11.5)  | 15 (12.3)  | 26 (19.5)  |
| 4           | 11 (4.5)   | 6 (4.9)    | 9 (6.8)    |
| 5           | 3 (1.2)    | 1 (0.8)    | 10 (7.5)   |
| 6           | 0 (0)      | 1 (0.8)    | 1 (0.8)    |
| HKLC stage  |            |            |            |
| I           | 126 (51.9) | 64 (52.5)  | 64 (48.1)  |
| IIa         | 0 (0)      | 3 (2.5)    | 0 (0)      |
| IIb         | 105 (43.2) | 48 (39.3)  | 53 (39.8)  |
| IIIa        | 2 (0.8)    | 2 (1.6)    | 5 (3.8)    |
| IIIb        | 10 (4.1)   | 5 (4.1)    | 11 (8.3)   |
| CUPI score  |            |            |            |
| -7          | 153 (63.0) | 71 (58.2)  | 75 (56.4)  |
| -5          | 67 (27.6)  | 40 (32.8)  | 30 (22.6)  |
| -4          | 10 (4.1)   | 1 (0.8)    | 17 (12.8)  |
| -3          | 8 (3.3)    | 6 (4.9)    | 4 (3.0)    |
| -2          | 5 (2.1)    | 4 (3.3)    | 3 (2.3)    |
| -1          | 0 (0)      | 0 (0)      | 1 (0.8)    |
| 0           | 0 (0)      | 0 (0)      | 2 (1.5)    |
| 2           | 0 (0)      | 0 (0)      | 1 (0.8)    |
| Recurrence  |            |            |            |
| absent      | 145 (59.7) | 53 (43.4)  | 63 (47.4)  |
| present     | 98 (40.3)  | 69 (56.6)  | 70 (52.6)  |

Continuous variables are expressed as the mean  $\pm$  standard deviation (SD) or median (interquartile range [IQR]). Categorical variables are expressed as numbers (%).

**Abbreviations:** JIS, Japan Integrated Staging; TNM, AJCC tumor-node-metastasis staging system (eighth edition); BCLC, Barcelona Clinic Liver Cancer; HKLC, Hong Kong Liver Cancer; CUPI, Chinese University Prognostic Index; VETC, vessels encapsulating tumor clusters; MVI, microvascular invasion; HBV, hepatitis B virus; HCV, hepatitis C virus; AFP, alpha-fetoprotein; PLT, platelets; ALB, albumin; PT, prothrombin time; NE, neutrophil; WBC, white blood cells; CRP, C-reactive protein; ALT, alanine transaminase; AST, aspartic transaminase.

**eTable 2. Contributions of Different Variables to the Prediction of HCC Recurrence**

| Model                                               | Training cohort     |                |                       |                | Internal validation cohort |                |                       |                | External validation cohort |                |                       |                |
|-----------------------------------------------------|---------------------|----------------|-----------------------|----------------|----------------------------|----------------|-----------------------|----------------|----------------------------|----------------|-----------------------|----------------|
|                                                     | Comparing C-index   |                | Likelihood ratio test |                | Comparing C-index          |                | Likelihood ratio test |                | Comparing C-index          |                | Likelihood ratio test |                |
|                                                     | C-index (95% CI)    | <i>P</i> value | $\chi^2$              | <i>P</i> value | C-index (95% CI)           | <i>P</i> value | $\chi^2$              | <i>P</i> value | C-index (95% CI)           | <i>P</i> value | $\chi^2$              | <i>P</i> value |
| VMNS model                                          | 0.702 (0.653-0.752) |                |                       |                | 0.673 (0.611-0.735)        |                |                       |                | 0.720 (0.665-0.776)        |                |                       |                |
| <b>Effect of adding variable to VMNS model</b>      |                     |                |                       |                |                            |                |                       |                |                            |                |                       |                |
| + Tumor differentiation                             | 0.712 (0.665-0.760) | 0.155          | 2.574                 | 0.109          | 0.675 (0.612-0.737)        | 0.863          | 0.074                 | 0.786          | 0.730 (0.676-0.784)        | 0.228          | 1.357                 | 0.244          |
| <b>Effect of deleting variables from VMNS model</b> |                     |                |                       |                |                            |                |                       |                |                            |                |                       |                |
| - VETC                                              | 0.696 (0.646-0.745) | 0.489          | 7.453                 | 0.006          | 0.643 (0.579-0.707)        | 0.027          | 8.190                 | 0.004          | 0.704 (0.648-0.759)        | 0.140          | 5.774                 | 0.016          |
| - MVI                                               | 0.685 (0.633-0.737) | 0.191          | 6.575                 | 0.010          | 0.661 (0.593-0.730)        | 0.489          | 1.672                 | 0.196          | 0.704 (0.644-0.764)        | 0.255          | 4.961                 | 0.026          |
| - (VETC and MVI)                                    | 0.672 (0.618-0.726) | 0.103          | 16.680                | <0.001         | 0.625 (0.555-0.696)        | 0.032          | 11.127                | 0.004          | 0.689 (0.630-0.748)        | 0.073          | 12.125                | 0.002          |

“+” indicates the addition of the variable to the VMNS model; “-” indicates the deletion of the variables from the VMNS model;  $\chi^2$  is the likelihood ratio statistic for the variables when added to the VMNS model or deleted from the VMNS model.

**Abbreviations:** HCC, hepatocellular carcinoma; C-index, Harrell concordance index; CI, confidence interval; VMNS, VETC (vessels encapsulating tumor clusters)-MVI (microvascular invasion)-number-size; VETC, vessels encapsulating tumor clusters; MVI, microvascular invasion.

**eTable 3. 2-Year AUROC of Different Models of Recurrence-Free Survival in the Training and Validation Cohorts**

| Prognostic model | Training cohort       |                                           | Internal validation cohort |                                           | External validation cohort |                                           |
|------------------|-----------------------|-------------------------------------------|----------------------------|-------------------------------------------|----------------------------|-------------------------------------------|
|                  | 2-year AUROC (95% CI) | <i>P</i> value (compared with VMNS score) | 2-year AUC (95% CI)        | <i>P</i> value (compared with VMNS score) | 2-year AUROC (95% CI)      | <i>P</i> value (compared with VMNS score) |
| VMNS score       | 0.754 (0.686 - 0.822) |                                           | 0.723 (0.631 - 0.815)      |                                           | 0.808 (0.727 - 0.889)      |                                           |
| TNM stage        | 0.668 (0.600 - 0.736) | 0.001                                     | 0.627 (0.540 - 0.713)      | 0.005                                     | 0.710 (0.627 - 0.794)      | 0.003                                     |
| BCLC stage       | 0.603 (0.551 - 0.654) | < 0.001                                   | 0.563 (0.499 - 0.627)      | < 0.001                                   | 0.644 (0.569 - 0.718)      | < 0.001                                   |
| HKLC stage       | 0.653 (0.586 - 0.721) | 0.003                                     | 0.643 (0.554 - 0.732)      | 0.030                                     | 0.706 (0.620 - 0.791)      | 0.020                                     |
| JIS score        | 0.687 (0.619 - 0.755) | 0.003                                     | 0.621 (0.531 - 0.711)      | 0.003                                     | 0.716 (0.633 - 0.799)      | 0.003                                     |
| Tokyo score      | 0.637 (0.565 - 0.709) | 0.001                                     | 0.610 (0.515 - 0.705)      | 0.008                                     | 0.684 (0.592 - 0.775)      | 0.009                                     |
| CUPI score       | 0.596 (0.528 - 0.664) | < 0.001                                   | 0.498 (0.406 - 0.590)      | < 0.001                                   | 0.672 (0.584 - 0.760)      | 0.010                                     |

**Abbreviations:** AUROC, area under the receiver operating characteristic curve; CI, confidence interval; VMNS score, VETC (vessels encapsulating tumor clusters)-MVI (microvascular invasion)-number-size score; JIS, Japan Integrated Staging; TNM, AJCC tumor-node-metastasis staging system (eighth edition); BCLC, Barcelona Clinic Liver Cancer; HKLC, Hong Kong Liver Cancer; CUPI, Chinese University Prognostic Index.

**eTable 4. Hazard Ratio and 2- and 5-Year Recurrence-Free Survival According to Each Risk Group Defined by the VMNS Score**

| Cohort                     | Risk group | n   | HR (95% CI)            | P value | 2-year RFS, % | 5-year RFS, % |
|----------------------------|------------|-----|------------------------|---------|---------------|---------------|
| Training cohort            | low        | 122 | ref                    |         | 81.4          | 73.1          |
|                            | medium     | 84  | 2.051 (1.248 - 3.371)  | < 0.001 | 62.1          | 54.5          |
|                            | high       | 37  | 5.465 (2.624 - 11.380) | < 0.001 | 30.1          | 18.0          |
| Internal validation cohort | low        | 64  | ref                    |         | 63.8          | 57.3          |
|                            | medium     | 42  | 1.876 (1.064 - 3.306)  | 0.009   | 44.2          | 35.5          |
|                            | high       | 16  | 4.310 (1.534 - 12.110) | < 0.001 | 10.0          | 10.0          |
| External validation cohort | low        | 70  | ref                    |         | 79.8          | 56.8          |
|                            | medium     | 44  | 2.649 (1.470 - 4.776)  | < 0.001 | 46.3          | 24.1          |
|                            | high       | 19  | 6.183 (2.247 - 17.010) | < 0.001 | 11.1          | 0             |

**Abbreviations:** VMNS score, VETC (vessels encapsulating tumor clusters)-MVI (microvascular invasion)-number-size score; HR, hazard ratio; CI: confidence interval; RFS, recurrence-free survival.

**eFigure 1.** Representative Morphological Features of VETC in HCC Tissues by Immunohistochemical Staining of Human CD34

(A) VETC-positive phenotype distinguished by vessels that formed a cobweb-like pattern and encapsulated tumor clusters.

(B) VETC-negative phenotype distinguished by the presence of capillary vessels.

Abbreviations: VETC, vessels encapsulating tumor clusters; HCC, hepatocellular carcinoma.

A

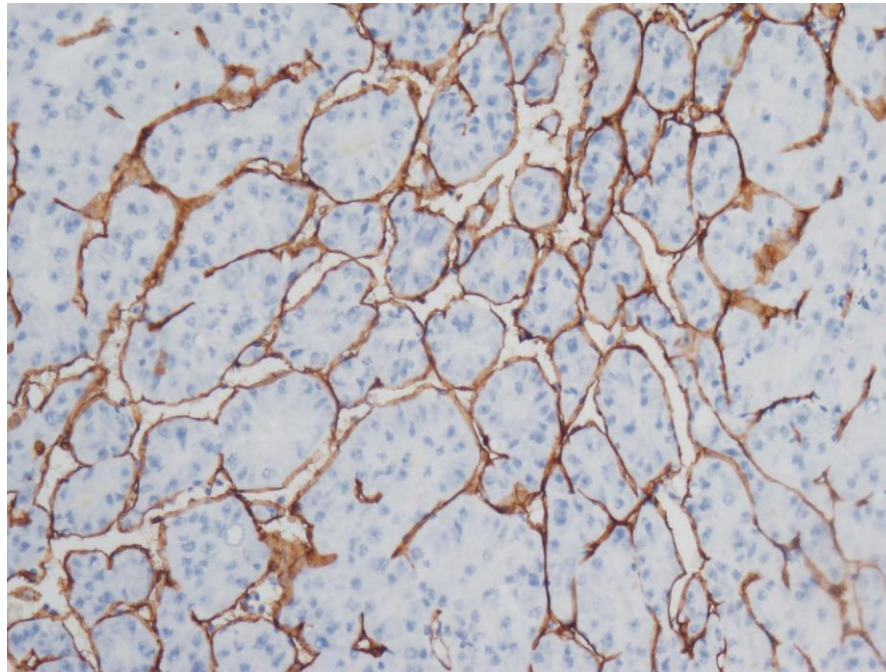

VETC-positive

B

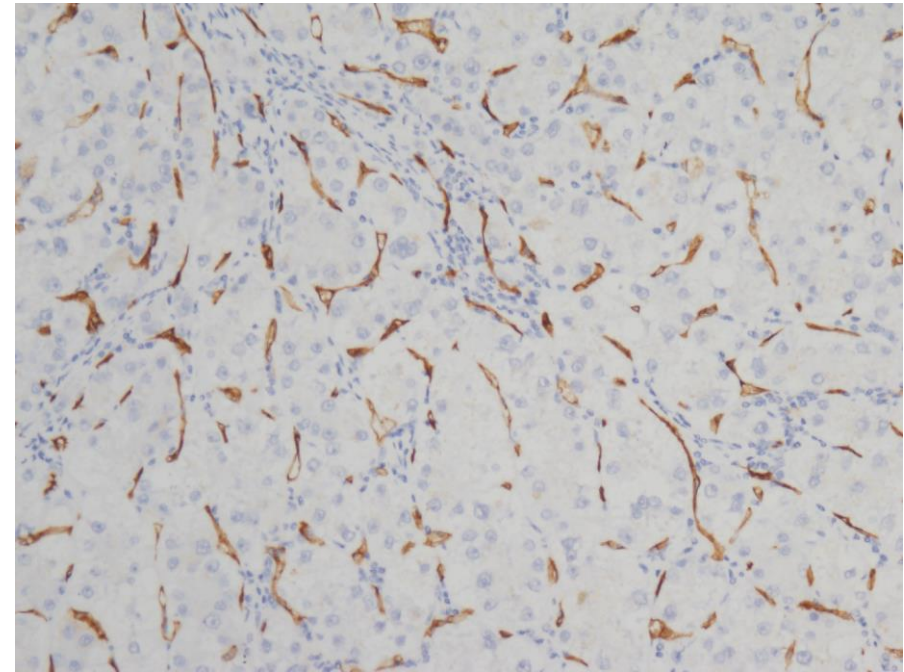

VETC-negative

**eFigure 2.** Variable Selection Using LASSO Cox Proportional Hazards Regression Model

(A) The two vertical lines are drawn at the optimal values by minimum criteria (left) and 1-SE criteria (right), which result in selecting 5 variables (VETC, MVI, tumor number, ln (maximum tumor size) and tumor differentiation) and 4 variables (VETC, MVI, tumor number and ln (maximum tumor size)), respectively. Details are provided in Methods.

(B) LASSO coefficient profiles of the 23 variables. Each curve corresponds to a variable.

Abbreviations: LASSO, the least absolute shrinkage and selection operator; SE, standard error; VETC, vessels encapsulating tumor clusters; MVI, microvascular invasion.

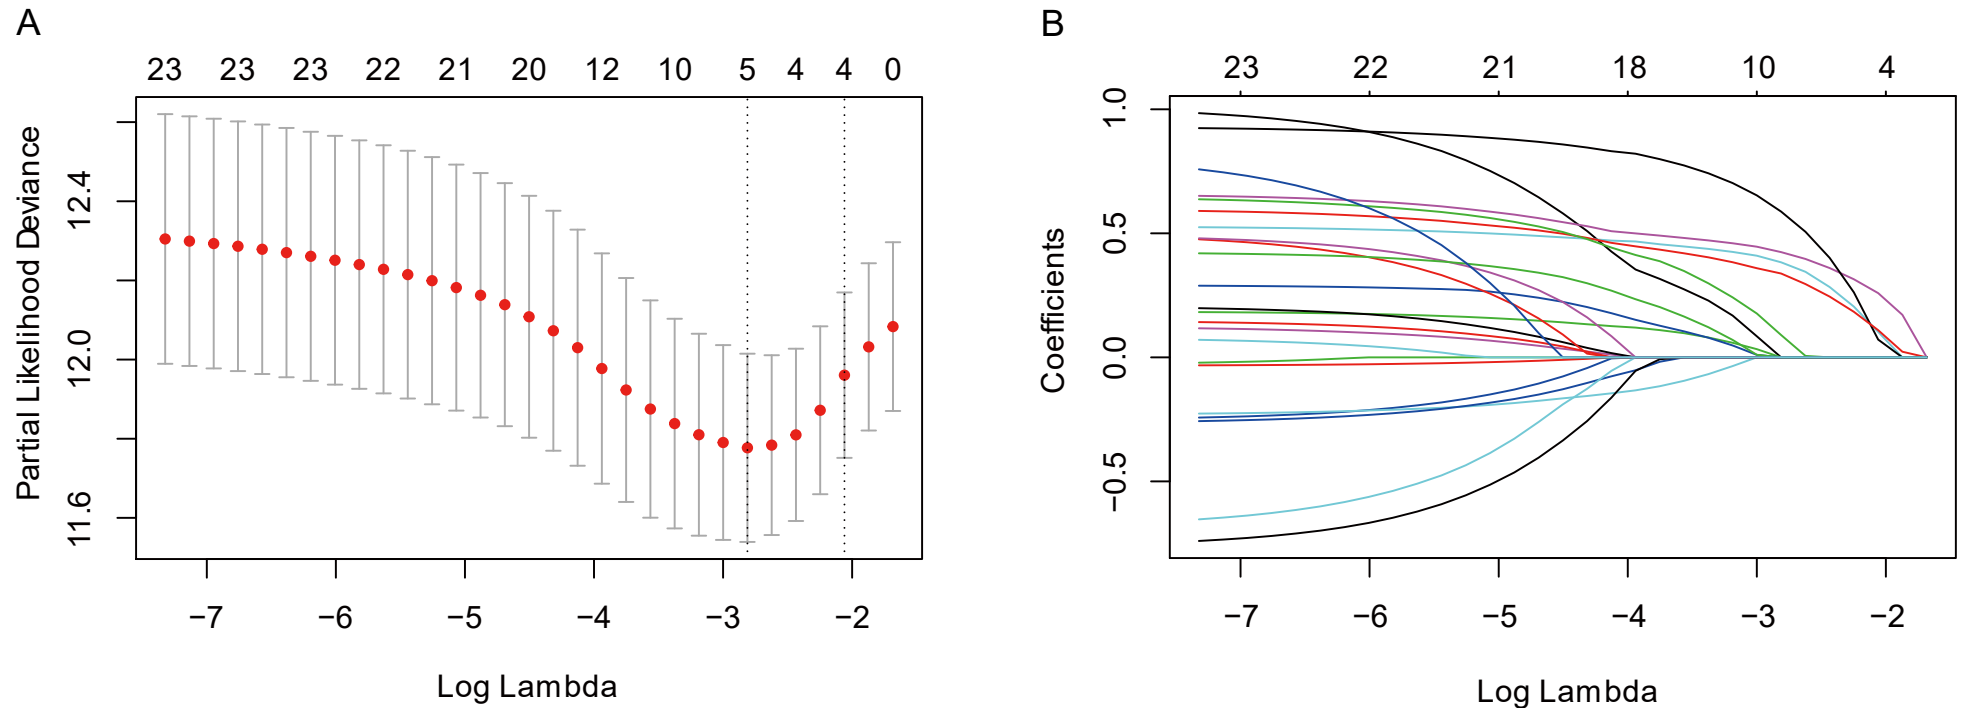



**eFigure 3.** Calibration Curves of the VMNS Nomogram at 2 Years in Each Cohort

(A, training cohort; B, internal validation cohort; C, external validation cohort). Abbreviations: RFS, recurrence-free survival; VMNS, VETC (vessels encapsulating tumor clusters) -MVI (microvascular invasion)-number-size.

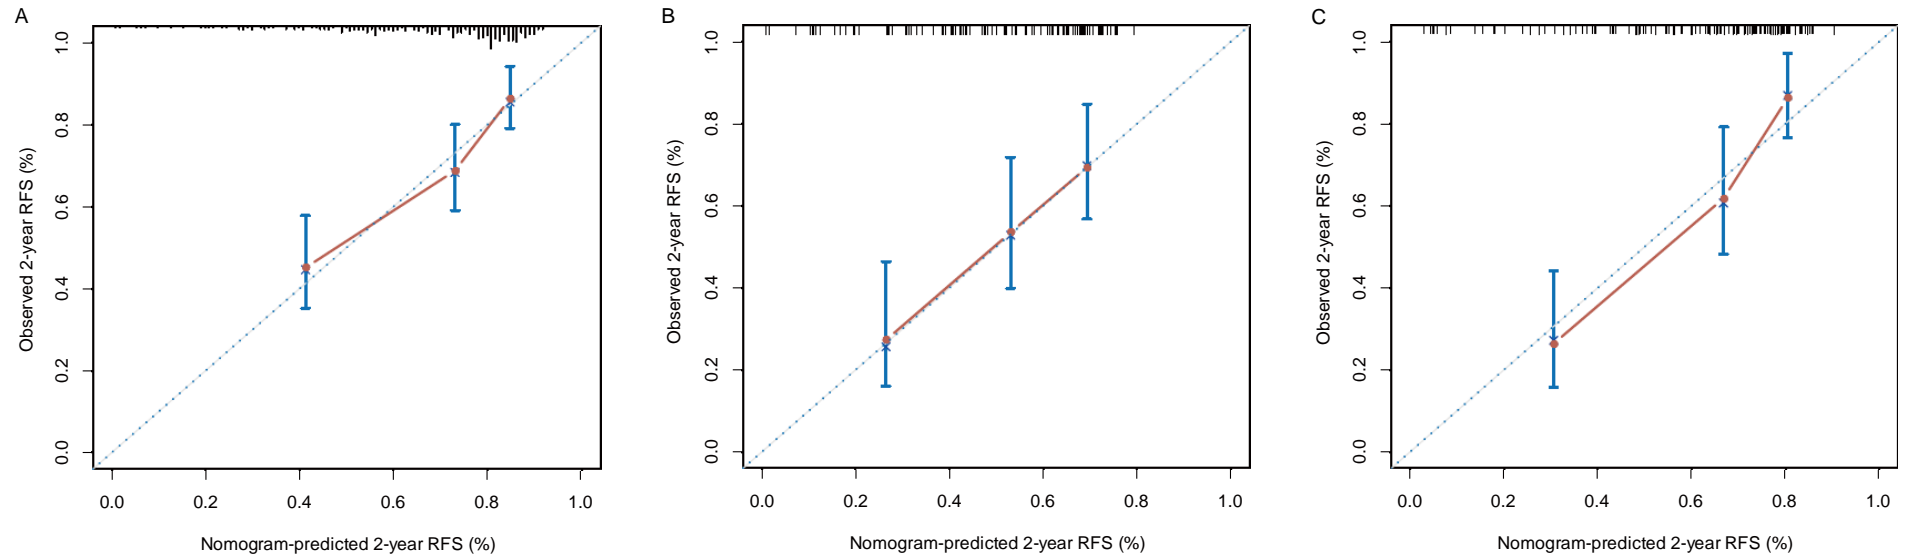

Supplement: jamanetwopen-e2125055-s001.pdf [file jamanetwopen-e2125055-s001.pdf]
